# Supplementary material for: An acetylation-mediated chromatin switch governs H3K4 methylation read-write capability
Source: eLife. 2023 May 19;12:e82596. doi: 10.7554/eLife.82596 (PMC10229121; doi:10.7554/eLife.82596)
Supplement: Figure 1—figure supplement 1—source data 1. [file elife-82596-fig1-figsupp1-data1.xlsx]

## Sheet: Sheet1
Presented as: Average EC50 (CI95), nM
EC50rel values with PHD readers and histone peptides (nM)
Peptides	KDM7A	DIDO1	MLL5
H3 1-20	ND	ND	ND
H3K4me3	0.34 (0.311-0.375)	0.1 (0.084-0.121)	0.15 (0.125-0.188)
H3K4me3triac	0.27 (0.253-0.290)	0.35 (0.290-0.436)	0.15 (0.133-0.167)
H3Ktetraac	ND	ND	ND
EC50rel values with PHD readers and nucleosomes (nM)
Nucleosomes	KDM7A	DIDO1	MLL5
H3 unmodified	ND	ND	ND
H3K4me3	16.3 (16.1-16.5)	4 (3.82 - 4.14)	ND
H3K4me3triac	5.3 (5.17-5.46)	1.2 (1.14-1.27)	11.7 (11.3-11.9)
