# Supplementary material for: An acetylation-mediated chromatin switch governs H3K4 methylation read-write capability
Source: eLife. 2023 May 19;12:e82596. doi: 10.7554/eLife.82596 (PMC10229121; doi:10.7554/eLife.82596)
Supplement: Figure 2—figure supplement 1—source data 1. — Individual files, as well as a composite labeled file, of all raw Coomassie gels for images in Figure 2—figure supplement 1. Each raw image file name is labeled with the panel to which it corresponds in Figure 2—figure supplement 1 except for the composite labeled image, which has each image labeled with the corresponding panel within the composite image. [file elife-82596-fig2-figsupp1-data1.xlsx]

## Sheet: Sheet1
Presented as: Average EC50 (CI95), nM
EC50rel values with MLL1C and nucleosomes (nM)
Nucleosomes	MLL1C
H3 unmodified	3.2 (3.03-3.39)
H3N∆32	1.6 (1.49-1.80)
Tailless	2.1 (1.96-2.22)
H3triac	3.2 (2.96-3.36)
											Presented as: Average EC50 (CI95), nM
